# Supplementary material for: Plasma Metabolome Alterations Discriminate between COVID-19 and Non-COVID-19 Pneumonia
Source: MDPI journal article supplement (doi:10.3390/metabo12111058), 2022-11-02
Supplement: s1 [file s1]

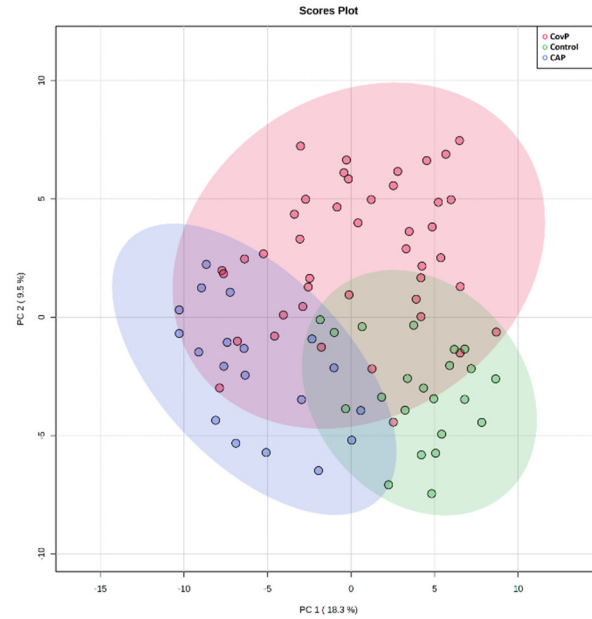

**Figure S1.** Principal component analysis score plot depicting clustering of COVID-19 pneumonia (CovP) (red), control subjects (Controls) (Green), and non-COVID-19 pneumonia (CAP) (Blue).

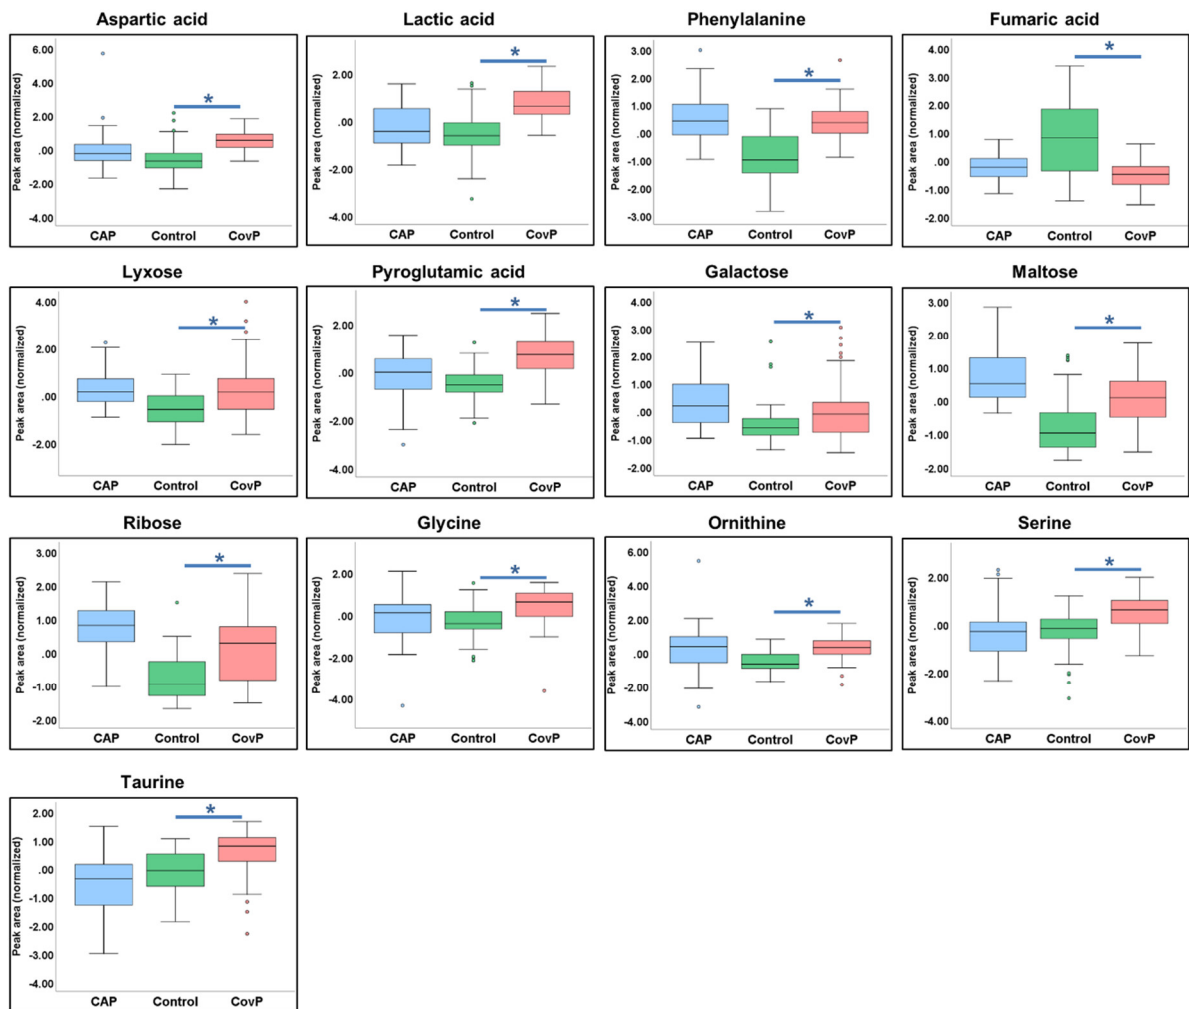

**Figure S2.** Box-and-whisker plots of COVID-19 pneumonia (CovP) specific significant metabolic differences as compared to controls obtained after Tukey's HSD and illustrated as normalized peak

area differences. [Non-COVID-19 pneumonia (blue box), Control samples (green box), COVID-19 pneumonia (red box), an asterisk indicates p-value  $\leq 0.05$ ].

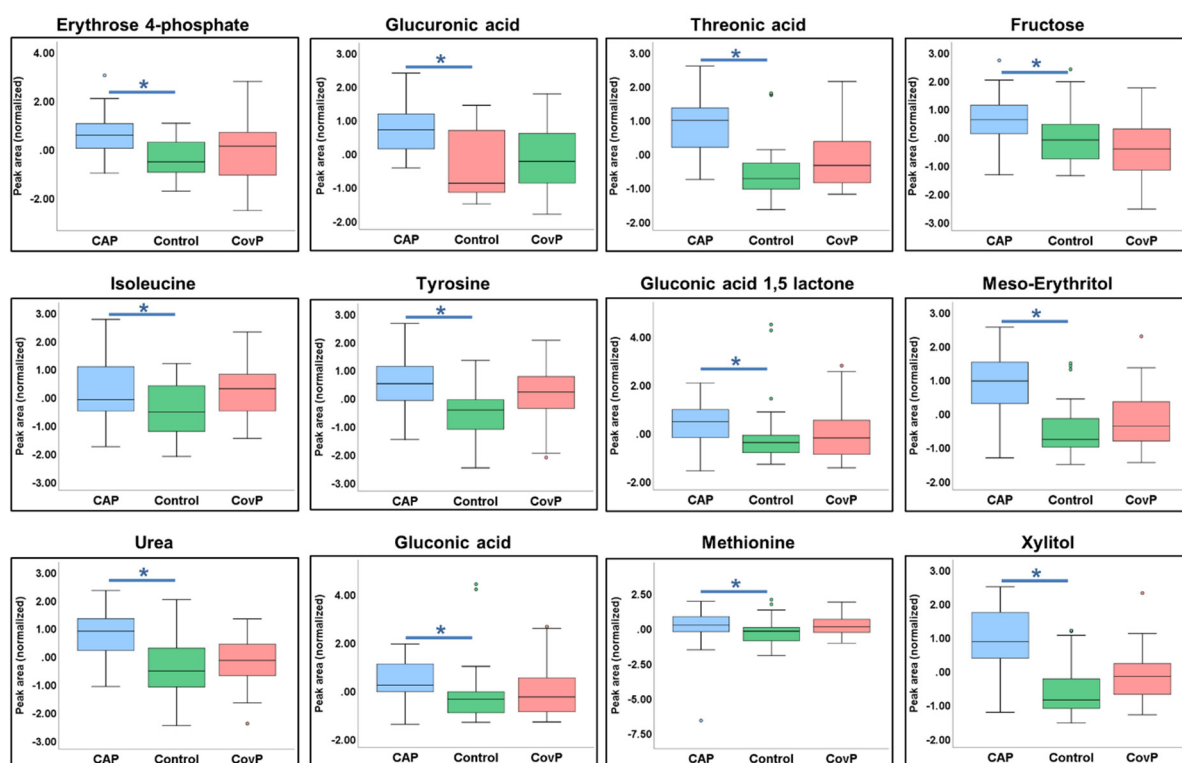

**Figure S3.** Box-and-whisker plots of non-COVID-19 pneumonia (CAP) specific significant metabolic differences as compared to controls obtained after Tukey's HSD and illustrated as normalized peak area differences. [non-COVID-19 pneumonia (blue box), Control samples (green box), COVID-19 pneumonia (red box), an asterisk indicates p-value  $\leq 0.05$ ].

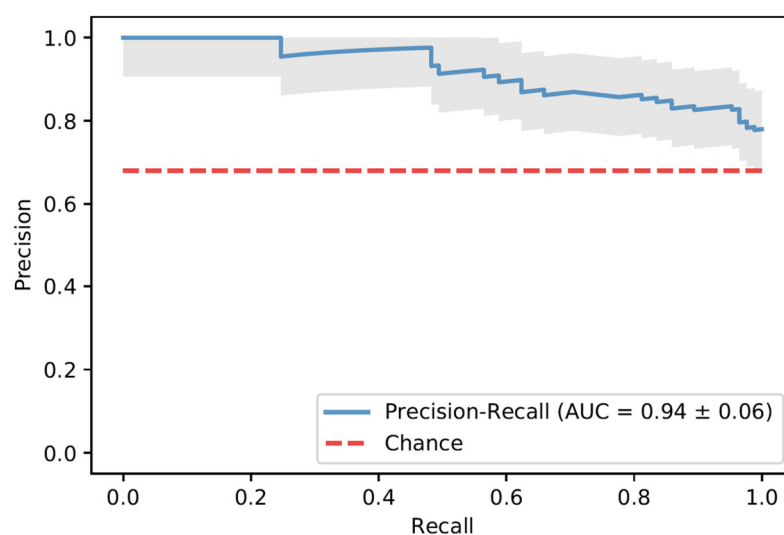

**Figure S4.** Precision recall curve. Precision is the ratio of the number of true positives divided by the sum of true positives and false positives, which characterizes the ability of the model to predict the positive samples correctly. It is complemented by the recall metric, which is the ratio of true positives to the actual positives of the data. A perfect model will have a precision and recall of 1 for every chosen threshold.

**Table S1.** Summary of the comorbidities of the study cohort.

| Comorbidity                   | Control    | Non-COVID-19<br>Pneumonia | COVID-19<br>Pneumonia |
|-------------------------------|------------|---------------------------|-----------------------|
| Arterial hypertension         | 14 (53.8%) | 15 (65.2%)                | 9 (20.9%)             |
| Myocardial infarction         | 2 (7.7%)   | 7 (30.4%)                 | 0 (0%)                |
| Cerebrovascular accident      | 2 (7.7%)   | 6 (26.1%)                 | 0 (0%)                |
| Vein thrombosis               | 0 (0%)     | 0 (0%)                    | 0 (0%)                |
| Liver cirrhosis               | 2 (7.7%)   | 1 (4.3%)                  | 0 (0%)                |
| Hyperthyroidism               | 2 (7.7%)   | 0 (0%)                    | 2 (4.7%)              |
| Hypothyroidism                | 0 (0%)     | 2 (8.7%)                  | 0 (0%)                |
| Diabetes type without Insulin | 8 (30.8%)  | 3 (13%)                   | 3 (7%)                |
| Diabetes type 2 with Insulin  | 0 (0%)     | 6 (26.1%)                 | 0 (0%)                |
| Hyperlipidemia                | 2 (7.7%)   | 6 (26.1%)                 | 1 (2.3%)              |
| Anemia                        | 4 (15.4%)  | 5 (21.7%)                 | 0 (0%)                |
| Cancer                        | 20 (76.9%) | 2 (8.7%)                  | 5 (11.6%)             |
| Osteoporosis                  | 1 (3.8%)   | 0 (0%)                    | 0 (0%)                |
| Smoking                       | 0 (0%)     | 7 (35%)                   | 0 (0%)                |
| Ischemic brain insult         | 0 (0%)     | 0 (0%)                    | 3 (7%)                |
| Allergies                     | 0 (0%)     | 0 (0%)                    | 3 (7%)                |
| Hepatitis                     | 0 (0%)     | 0 (0%)                    | 1 (2.3%)              |
| Kidney transplant             | 0 (0%)     | 0 (0%)                    | 1 (2.3%)              |
| Asthma                        | 0 (0%)     | 0 (0%)                    | 2 (4.7%)              |
| Cholelithiasis                | 0 (0%)     | 0 (0%)                    | 2 (4.7%)              |
| Chronic Kidney disease        | 0 (0%)     | 0 (0%)                    | 2 (4.7%)              |
| COPD                          | 0 (0%)     | 0 (0%)                    | 1 (2.3%)              |
| Coronary artery disease       | 0 (0%)     | 0 (0%)                    | 1 (2.3%)              |
| Depression                    | 0 (0%)     | 0 (0%)                    | 1 (2.3%)              |
| Dilative cardiomyopathy       | 0 (0%)     | 0 (0%)                    | 1 (2.3%)              |
| Epilepsy                      | 0 (0%)     | 0 (0%)                    | 1 (2.3%)              |
| Diverticulosis                | 0 (0%)     | 0 (0%)                    | 1 (2.3%)              |
| Parkinson                     | 0 (0%)     | 0 (0%)                    | 1 (2.3%)              |
| Myeloplast. syndrom           | 0 (0%)     | 0 (0%)                    | 1 (2.3%)              |
| Nephrolithiasis               | 0 (0%)     | 0 (0%)                    | 1 (2.3%)              |
| Plasmozytoma                  | 0 (0%)     | 0 (0%)                    | 1 (2.3%)              |
| Pulmonary artery embolisms    | 0 (0%)     | 0 (0%)                    | 1 (2.3%)              |
| Autoimmune disease            | 0 (0%)     | 0 (0%)                    | 1 (2.3%)              |

**Table S2.** Detailed characteristics of all COVID-19 patients. [Disease severity, 1 = normal care unit, 2 = intensive care unit; NA = not available].

| #  | Age | Sex | Disease severity | Death | Height (cm) | Weight (kg) | Comorbidity                                   |
|----|-----|-----|------------------|-------|-------------|-------------|-----------------------------------------------|
| 1  | 3   | F   | 1                | No    | 100         | 15          | -                                             |
| 2  | 7   | M   | 1                | No    | 135         | 30          | -                                             |
| 3  | 72  | M   | 1                | No    | 177         | 86          | Reflux esophagitis, colon diverticulosis, NHL |
| 4  | 12  | M   | 1                | No    | 142         | 30          | -                                             |
| 5  | 17  | M   | 1                | No    | 0           | 87          | -                                             |
| 6  | 66  | F   | NA               | No    | NA          | NA          | -                                             |
| 7  | 85  | F   | 1                | No    | NA          | NA          | -                                             |
| 8  | 15  | F   | 1                | No    | 169         | 56          | -                                             |
| 9  | 5   | M   | 1                | No    | 125         | 23          | -                                             |
| 10 | 91  | M   | 1                | No    | NA          | NA          | -                                             |
| 11 | 5   | M   | 1                | No    | NA          | NA          | -                                             |
| 12 | 52  | M   | 2                | No    | 186         | 93          | -                                             |
| 13 | 64  | M   | 2                | No    | NA          | NA          | -                                             |
| 14 | 50  | M   | 2                | No    | NA          | NA          | Hyperthyroidism                               |

|    |    |   |   |     |     |      |                                                                                |
|----|----|---|---|-----|-----|------|--------------------------------------------------------------------------------|
| 15 | 51 | M | 1 | No  | NA  | NA   | M. Parkinson                                                                   |
| 16 | 58 | M | 1 | No  | 175 | 100  | Art. Hypertension                                                              |
| 17 | 54 | F | 1 | No  | 175 | 55   | Pulmonary artery embolisms, autoimmune disease                                 |
| 18 | 23 | F | 1 | No  | 169 | 75   | Epilepsy, allergies                                                            |
| 19 | 61 | F | 1 | No  | 163 | 92   | Breast cancer, art. Hypertension                                               |
| 20 | 52 | F | 1 | No  | 169 | 89   | Dilative cardiomyopathy, Diabetes mell. Type 2, Asthma bronchiale              |
| 21 | 69 | M | 1 | No  | 182 | 84   | Chron. Kidney disease, coronary arterial disease, Diabetes mell. type 2        |
| 22 | 40 | F | 1 | No  | NA  | NA   | -                                                                              |
| 23 | 76 | M | 1 | No  | 173 | 70   | -                                                                              |
| 24 | 80 | F | 1 | No  | 164 | 66   | Hyperlipidemia, art. hypertension, breast cancer, diverticulosis               |
| 25 | 28 | F | 1 | No  | 158 | 45   | Asthma bronchiale                                                              |
| 26 | 79 | M | 1 | No  | 175 | 100  | Art. Hypertension                                                              |
| 27 | 88 | M | 1 | No  | 165 | 45   | -                                                                              |
| 28 | 67 | M | 1 | No  | 184 | 114  | Art. Hypertension, Hepatitis                                                   |
| 29 | 90 | F | 1 | No  | NA  | NA   | Art. Hypertension, Diabetes mell. Type 2, ischemic brain insult, breast cancer |
| 30 | 85 | M | 1 | No  | NA  | NA   | Chronic kidney disease                                                         |
| 31 | 82 | M | 1 | No  | NA  | NA   | ischemic brain insult, hyperthyroidism                                         |
| 32 | 89 | F | 1 | No  | NA  | NA   | -                                                                              |
| 33 | 13 | M | 1 | No  | NA  | 44   | Depression                                                                     |
| 34 | 59 | M | 1 | Yes | 182 | 80   | Art. Hypertension, Diabetes mell. type 2, allergies                            |
| 35 | 55 | M | 2 | Yes | NA  | NA   | Nephrolithiasis, cholelithiasis                                                |
| 36 | 49 | M | 2 | Yes | 185 | 120  | Cholelithiasis                                                                 |
| 37 | 86 | M | 2 | Yes | NA  | NA   | Coronary artery disease                                                        |
| 38 | 70 | W | 1 | Yes | NA  | 66.5 | Art. hypertension, kidney transplant                                           |
| 39 | 71 | F | 2 | Yes | 182 | 88   | Art. hypertension, allergies                                                   |
| 40 | 60 | M | 1 | Yes | NA  | NA   | ischemic brain insult                                                          |
| 41 | 85 | F | 1 | Yes | 1.7 | 73   | Myeloplast. syndrom                                                            |
| 42 | 81 | M | 2 | Yes | 172 | 89   | Plasmozytoma, prostate cancer-Ca                                               |
| 43 | 62 | M | 1 | Yes | 170 | 108  | COPD, lung cancer                                                              |

**Table S3.** Significant metabolic differences among COVID-19 pneumonia (CovP), Control subjects, and non-COVID-19 pneumonia (CAP) revealed after ANOVA. [ Table sorted according to post hoc analysis; p-value: p-values obtained after performing ANOVA (p-value<0.05); FDR: value obtained after performing false discovery test; Tukey's HSD: result depicting group-specific significance after post-hoc analysis (Tukey's HSD); CovP/control: metabolic concentration (peak area) differences in COVID-19 pneumonia (CovP) compared to control subjects (↑ increased, ↓ decreased); CAP/control: metabolic concentration differences (peak area) in non-COVID-19 pneumonia compared to control subjects (↑ increased, ↓ decreased).

| Sr. No. | Metabolite        | p.value  | FDR      | Tukey's HSD            | CovP/<br>Control | CAP/<br>Control |
|---------|-------------------|----------|----------|------------------------|------------------|-----------------|
| 1       | Aspartic acid     | 2.65E-04 | 7.65E-04 | CovP-Control           | ↑                |                 |
| 2       | RI1637.76         | 5.01E-06 | 2.89E-05 | CovP-Control           | ↑                |                 |
| 3       | RI3819.77         | 5.66E-06 | 3.14E-05 | CovP-Control           | ↑                |                 |
| 4       | RI2591.08         | 2.15E-05 | 1.01E-04 | CovP-Control           | ↓                |                 |
| 5       | RI3790.91         | 2.83E-05 | 1.29E-04 | CovP-Control           | ↑                |                 |
| 6       | Glycine           | 7.04E-05 | 2.64E-04 | CovP-Control           | ↑                |                 |
| 7       | Serine            | 2.25E-04 | 6.89E-04 | CovP-Control           | ↑                |                 |
| 8       | RI1039.49         | 2.54E-04 | 7.47E-04 | CovP-Control           | ↓                |                 |
| 9       | RI3110.71         | 2.14E-03 | 5.10E-03 | CovP-Control           | ↓                |                 |
| 10      | RI1992.66         | 1.54E-10 | 4.38E-09 | CovP-Control; CovP-CAP | ↑                |                 |
| 11      | Lactic acid       | 5.44E-08 | 5.10E-07 | CovP-Control; CovP-CAP | ↑                |                 |
| 12      | Taurine           | 1.72E-07 | 1.29E-06 | CovP-Control; CovP-CAP | ↑                |                 |
| 13      | Pyroglutamic acid | 3.83E-07 | 2.61E-06 | CovP-Control; CovP-CAP | ↑                |                 |
| 14      | RI2719.45         | 4.01E-06 | 2.49E-05 | CovP-Control; CovP-CAP | ↓                |                 |
| 15      | RI1503.85         | 2.16E-05 | 1.01E-04 | CovP-Control; CovP-CAP | ↓                |                 |

|    |                           |          |          |                                     |   |   |
|----|---------------------------|----------|----------|-------------------------------------|---|---|
| 16 | RI1317.28                 | 1.11E-04 | 3.71E-04 | CovP-Control; CovP-CAP              | ↓ |   |
| 17 | RI1854.02                 | 3.28E-04 | 8.95E-04 | CovP-Control; CovP-CAP              | ↓ |   |
| 18 | RI1125.72                 | 2.40E-04 | 7.21E-04 | CovP-CAP                            |   |   |
| 19 | Fumaric acid              | 2.36E-10 | 4.40E-09 | CovP-Control; CAP-Control           | ↓ | ↓ |
| 20 | Phenylalanine             | 3.68E-10 | 5.52E-09 | CovP-Control; CAP-Control           | ↑ | ↑ |
| 21 | N-Carboxyglycine          | 5.41E-10 | 7.38E-09 | CovP-Control; CAP-Control           | ↓ | ↓ |
| 22 | RI2109.26                 | 3.14E-05 | 1.39E-04 | CovP-Control; CAP-Control           | ↑ | ↑ |
| 23 | RI1619.34                 | 3.31E-05 | 1.42E-04 | CovP-Control; CAP-Control           | ↑ | ↑ |
| 24 | RI1532.53                 | 8.60E-05 | 3.07E-04 | CovP-Control; CAP-Control           | ↑ | ↑ |
| 25 | Ornithine                 | 2.09E-04 | 6.60E-04 | CovP-Control; CAP-Control           | ↑ | ↑ |
| 26 | RI1759.09                 | 2.73E-04 | 7.72E-04 | CovP-Control; CAP-Control           | ↑ | ↑ |
| 27 | Galactose                 | 6.01E-04 | 1.56E-03 | CovP-Control; CAP-Control           | ↑ | ↑ |
| 28 | Lyxose                    | 1.02E-03 | 2.56E-03 | CovP-Control; CAP-Control           | ↑ | ↑ |
| 29 | RI1201.11                 | 2.30E-03 | 5.30E-03 | CovP-Control; CAP-Control           | ↑ |   |
| 30 | RI1451.15                 | 7.76E-15 | 1.16E-12 | CAP-Control; CovP-CAP; CovP-Control | ↑ | ↑ |
| 31 | RI1467.82                 | 2.57E-11 | 1.93E-09 | CAP-Control; CovP-CAP; CovP-Control | ↑ | ↑ |
| 32 | Maltose                   | 1.75E-10 | 4.38E-09 | CAP-Control; CovP-CAP; CovP-Control | ↑ | ↑ |
| 33 | RI2647.41                 | 2.64E-10 | 4.40E-09 | CAP-Control; CovP-CAP; CovP-Control | ↑ | ↑ |
| 34 | Ribose                    | 1.44E-08 | 1.54E-07 | CAP-Control; CovP-CAP; CovP-Control | ↑ | ↑ |
| 35 | Threonic acid             | 4.65E-11 | 2.33E-09 | CAP-Control; CovP-CAP               |   | ↑ |
| 36 | Xylitol                   | 1.33E-10 | 4.38E-09 | CAP-Control; CovP-CAP               |   | ↑ |
| 37 | RI1857.13                 | 2.27E-10 | 4.40E-09 | CAP-Control; CovP-CAP               |   | ↑ |
| 38 | meso-Erythritol           | 3.52E-09 | 4.41E-08 | CAP-Control; CovP-CAP               |   | ↑ |
| 39 | RI1680.27                 | 1.20E-08 | 1.39E-07 | CAP-Control; CovP-CAP               |   | ↑ |
| 40 | RI1633.64                 | 2.60E-08 | 2.60E-07 | CAP-Control; CovP-CAP               |   | ↑ |
| 41 | RI2340.12                 | 6.12E-08 | 5.40E-07 | CAP-Control; CovP-CAP               |   | ↑ |
| 42 | RI1360.57                 | 1.08E-07 | 9.02E-07 | CAP-Control; CovP-CAP               |   | ↑ |
| 43 | Urea                      | 1.17E-07 | 9.20E-07 | CAP-Control; CovP-CAP               |   | ↑ |
| 44 | RI2960.53                 | 3.38E-07 | 2.41E-06 | CAP-Control; CovP-CAP               |   | ↑ |
| 45 | RI2855.95                 | 1.64E-06 | 1.07E-05 | CAP-Control; CovP-CAP               |   | ↑ |
| 46 | RI1361.34                 | 4.15E-06 | 2.49E-05 | CAP-Control; CovP-CAP               |   | ↓ |
| 47 | RI1612.75                 | 9.45E-06 | 4.94E-05 | CAP-Control; CovP-CAP               |   | ↑ |
| 48 | Fructose                  | 9.56E-06 | 4.94E-05 | CAP-Control; CovP-CAP               |   | ↑ |
| 49 | RI2509.680                | 1.47E-05 | 7.33E-05 | CAP-Control; CovP-CAP               |   | ↓ |
| 50 | RI1373                    | 3.60E-05 | 1.50E-04 | CAP-Control; CovP-CAP               |   | ↑ |
| 51 | Glucuronic acid           | 4.11E-05 | 1.67E-04 | CAP-Control; CovP-CAP               |   | ↑ |
| 52 | RI1150.81                 | 4.57E-05 | 1.80E-04 | CAP-Control; CovP-CAP               |   | ↑ |
| 53 | RI1390.85                 | 9.36E-05 | 3.26E-04 | CAP-Control; CovP-CAP               |   | ↑ |
| 54 | Gluconic acid             | 1.10E-04 | 3.71E-04 | CAP-Control; CovP-CAP               |   | ↑ |
| 55 | RI1083.74                 | 1.55E-04 | 5.04E-04 | CAP-Control; CovP-CAP               |   | ↑ |
| 56 | Gluconic acid 1,5-lactone | 2.11E-04 | 6.60E-04 | CAP-Control; CovP-CAP               |   | ↑ |
| 57 | Erythrose-4-phosphate     | 6.26E-04 | 1.59E-03 | CAP-Control; CovP-CAP               |   | ↑ |
| 58 | RI1383.17                 | 1.87E-03 | 4.51E-03 | CAP-Control; CovP-CAP               |   | ↑ |
| 59 | RI1261.62                 | 2.18E-03 | 5.12E-03 | CAP-Control; CovP-CAP               |   | ↑ |
| 60 | RI2812.75                 | 3.26E-04 | 8.95E-04 | CAP-Control                         |   | ↑ |
| 61 | RI2603.98                 | 3.75E-04 | 1.00E-03 | CAP-Control                         |   | ↑ |
| 62 | Methionine                | 5.16E-04 | 1.36E-03 | CAP-Control                         |   | ↑ |
| 63 | Tyrosine                  | 1.19E-03 | 2.93E-03 | CAP-Control                         |   | ↑ |
| 64 | RI1782.79                 | 2.81E-03 | 6.38E-03 | CAP-Control                         |   | ↑ |
| 65 | RI3283.77                 | 3.53E-03 | 7.91E-03 | CAP-Control                         |   | ↑ |
| 66 | Isoleucine                | 4.13E-03 | 8.98E-03 | CAP-Control                         |   | ↑ |

**Table S4.** List of all cytokines with their means of delta values, standard deviation and median.

| Cytokines         | Groups    | Mean    | Standard Deviation | Median  | Range   |
|-------------------|-----------|---------|--------------------|---------|---------|
| Alb_delta         | Control   | -0.0909 | 2.0681             | -1.0000 | 8.0000  |
|                   | Pneumonia | 2.4118  | 8.1705             | 1.0000  | 35.0000 |
|                   | COVID-19  | 2.1111  | 7.7208             | 2.0000  | 22.0000 |
| GEW_delta         | Control   | 0.1905  | 3.6826             | 1.0000  | 13.0000 |
|                   | Pneumonia | 3.0500  | 14.4858            | -1.0000 | 66.0000 |
|                   | COVID-19  | 3.3333  | 15.2807            | -1.0000 | 44.0000 |
| Adiponectin_delta | Control   | -0.0840 | 0.8214             | 0.1000  | 3.2000  |
|                   | Pneumonia | 0.0957  | 1.2608             | -0.1000 | 5.0000  |

|                   |           |           |          |           |           |
|-------------------|-----------|-----------|----------|-----------|-----------|
| AAT_delta         | COVID-19  | -0.1444   | 0.4362   | -0.1000   | 1.5000    |
|                   | Control   | -0.0257   | 0.4075   | -0.1000   | 1.6000    |
|                   | Pneumonia | 0.0050    | 0.8763   | -0.1500   | 3.6000    |
| A2Macro_delta     | COVID-19  | -0.4222   | 0.7710   | -0.5000   | 2.3000    |
|                   | Control   | 0.0455    | 0.6139   | 0.0500    | 2.4000    |
|                   | Pneumonia | -0.2227   | 0.7597   | -0.1500   | 3.1000    |
| Lp(a)_delta       | COVID-19  | 0.0789    | 0.2983   | 0.2000    | 1.0000    |
|                   | Control   | -6.0591   | 32.4131  | 0.8500    | 146.0000  |
|                   | Pneumonia | -29.8182  | 110.0972 | -2.5000   | 582.0000  |
| B2M_delta         | COVID-19  | 4.0000    | 23.9344  | -4.0000   | 74.0000   |
|                   | Control   | -0.0450   | 0.4582   | -0.1000   | 2.0000    |
|                   | Pneumonia | -0.3100   | 2.1094   | -0.2000   | 10.0000   |
| BDNF_delta        | COVID-19  | -0.3000   | 0.4989   | -0.2500   | 1.8000    |
|                   | Control   | -0.2684   | 2.2774   | -0.5000   | 10.5000   |
|                   | Pneumonia | 0.2589    | 1.5914   | 0.2000    | 6.8000    |
| CRP_delta         | COVID-19  | 0.3650    | 0.9493   | 0.4000    | 2.7000    |
|                   | Control   | -2.0108   | 9.4620   | -0.1350   | 46.0000   |
|                   | Pneumonia | -7.6957   | 34.0634  | -4.0000   | 165.0000  |
| C3_delta          | COVID-19  | -24.6000  | 70.9322  | -22.5000  | 267.0000  |
|                   | Control   | -0.0319   | 0.2556   | -0.0200   | 1.1300    |
|                   | Pneumonia | -0.0668   | 0.2218   | -0.1000   | 0.8000    |
| EN-RAGE_delta     | COVID-19  | -0.0378   | 0.1861   | -0.1000   | 0.4500    |
|                   | Control   | -4.7692   | 125.2234 | -5.5000   | 620.0000  |
|                   | Pneumonia | -123.2609 | 238.6603 | -85.0000  | 968.0000  |
| Eotaxin-1_delta   | COVID-19  | -469.2000 | 496.6344 | -307.0000 | 1445.0000 |
|                   | Control   | -15.4211  | 58.2297  | -13.0000  | 217.0000  |
|                   | Pneumonia | 4.6667    | 71.7910  | -14.0000  | 258.0000  |
| Factor VII_delta  | COVID-19  | -15.8571  | 79.2095  | -21.0000  | 204.0000  |
|                   | Control   | 0.1200    | 25.7881  | 1.0000    | 92.0000   |
|                   | Pneumonia | -4.1739   | 37.9792  | -2.0000   | 176.0000  |
| FRTN_delta        | COVID-19  | -16.3000  | 21.4012  | -15.5000  | 66.0000   |
|                   | Control   | 24.8400   | 169.2229 | 21.0000   | 930.0000  |
|                   | Pneumonia | 81.1739   | 323.1415 | 48.0000   | 1660.0000 |
| Fibrinogen_delta  | COVID-19  | -246.5556 | 631.3195 | -220.0000 | 2040.0000 |
|                   | Control   | -0.0032   | 0.0070   | -0.0035   | 0.0240    |
|                   | Pneumonia | -0.0091   | 0.0421   | 0.0010    | 0.1860    |
| Haptoglobin_delta | COVID-19  | -0.0046   | 0.0098   | -0.0040   | 0.0270    |
|                   | Control   | 0.0598    | 0.5508   | 0.0600    | 2.2000    |
|                   | Pneumonia | -0.2229   | 0.7943   | 0.1000    | 3.0000    |
| IgA_delta         | COVID-19  | -0.2875   | 2.1424   | -0.2000   | 7.0000    |
|                   | Control   | -0.0542   | 0.5388   | -0.0500   | 2.6000    |
|                   | Pneumonia | -0.2025   | 0.4797   | -0.2000   | 1.6000    |
| IgM_delta         | COVID-19  | -0.5444   | 0.6064   | -0.3000   | 1.7000    |
|                   | Control   | 0.0295    | 0.3385   | 0.1000    | 1.2000    |
|                   | Pneumonia | -0.0273   | 0.4278   | -0.1000   | 2.0000    |
| ICAM-1_delta      | COVID-19  | -0.3889   | 0.4400   | -0.3000   | 1.6000    |
|                   | Control   | -0.3600   | 33.1145  | 4.0000    | 159.0000  |
|                   | Pneumonia | -12.1739  | 75.7692  | -4.0000   | 375.0000  |
| IL-1 beta_delta   | COVID-19  | -105.7778 | 167.2586 | -17.0000  | 449.0000  |
|                   | Control   | 0.2056    | 3.5541   | 0.8000    | 11.7000   |
|                   | Pneumonia | 0.2167    | 3.0438   | 0000      | 10.0000   |
| IL-1RA_delta      | COVID-19  | -1.7222   | 2.1592   | -1.6000   | 6.1000    |
|                   | Control   | 21.2400   | 126.3973 | 4.0000    | 682.0000  |
|                   | Pneumonia | -39.9524  | 81.8227  | -25.0000  | 402.0000  |
| IL-5_delta        | COVID-19  | -106.3000 | 122.5698 | -87.5000  | 370.0000  |
|                   | Control   | -8.5000   | .        | -8.5000   | 0000      |
|                   | Pneumonia | -3.0000   | 5.6569   | -3.0000   | 8.0000    |
| IL-6_delta        | COVID-19  | .         | .        | .         | .         |
|                   | Control   | -3.1545   | 5.4257   | -5.0000   | 15.4500   |
|                   | Pneumonia | -2.0263   | 7.8304   | -1.0000   | 39.0000   |
| IL-8_delta        | COVID-19  | -20.2000  | 38.8009  | -3.0000   | 127.0000  |
|                   | Control   | 1.3792    | 13.9171  | -2.0000   | 74.0000   |
|                   | Pneumonia | -0.6818   | 14.2641  | 1.0000    | 62.0000   |

|                   |           |           |          |           |           |
|-------------------|-----------|-----------|----------|-----------|-----------|
|                   | COVID-19  | -7.2222   | 23.7370  | 4.0000    | 73.0000   |
| IL-10_delta       | Control   | -2.7000   | 4.4981   | -2.5000   | 12.0000   |
|                   | Pneumonia | 1.1667    | 5.2496   | 2.0000    | 18.0000   |
|                   | COVID-19  | -4.6000   | 7.2449   | -3.5000   | 26.0000   |
| IL-12p40_delta    | Control   | -0.0415   | 0.1762   | -0.0900   | 0.6900    |
|                   | Pneumonia | 0.0323    | 0.1389   | 0.0500    | 0.5200    |
|                   | COVID-19  | 0.0075    | 0.2193   | -0.0050   | 0.6700    |
| IL-17_delta       | Control   | 0.1750    | 1.9276   | 0.3500    | 4.2000    |
|                   | Pneumonia | 0.0714    | 1.6469   | 0.5000    | 4.3000    |
|                   | COVID-19  | -0.0333   | 2.8290   | 1.6000    | 4.9000    |
| IL-18_delta       | Control   | -5.5000   | 91.2159  | -9.5000   | 498.0000  |
|                   | Pneumonia | -4.8333   | 100.3418 | -6.0000   | 410.0000  |
|                   | COVID-19  | -95.0000  | 203.4939 | -51.0000  | 670.0000  |
| MIP-1 alpha_delta | Control   | 12.4167   | 24.9780  | 16.0000   | 75.0000   |
|                   | Pneumonia | -13.1250  | 30.3268  | -14.5000  | 118.0000  |
|                   | COVID-19  | 4.0000    | 23.8956  | 9.0000    | 47.0000   |
| MIP-1 beta_delta  | Control   | -15.7500  | 69.4258  | -28.5000  | 239.0000  |
|                   | Pneumonia | -11.0000  | 84.7899  | -9.0000   | 340.0000  |
|                   | COVID-19  | -53.8000  | 97.0358  | -58.0000  | 285.0000  |
| MMP-3_delta       | Control   | -0.1044   | 0.9194   | -0.1000   | 5.0000    |
|                   | Pneumonia | -0.3162   | 1.7095   | -0.5000   | 7.0000    |
|                   | COVID-19  | -0.3875   | 0.4883   | -0.3000   | 1.4000    |
| MMP-9_delta       | Control   | -5.3684   | 19.8248  | -5.0000   | 65.0000   |
|                   | Pneumonia | 3.2500    | 21.0285  | 9.0000    | 69.0000   |
|                   | COVID-19  | 5.8333    | 18.8087  | -1.5000   | 44.0000   |
| MCP-1_delta       | Control   | -22.1000  | 81.6369  | -6.0000   | 292.0000  |
|                   | Pneumonia | -6.6818   | 163.8697 | 45.5000   | 540.0000  |
|                   | COVID-19  | -134.2000 | 561.4406 | -175.0000 | 2120.0000 |
| Myoglobin_delta   | Control   | 1.8619    | 13.3963  | -1.0000   | 59.0000   |
|                   | Pneumonia | 0.3571    | 10.9376  | 1.0000    | 42.0000   |
|                   | COVID-19  | 0.2500    | 3.2016   | -1.0000   | 7.0000    |
| PAI-1_delta       | Control   | -8.5652   | 39.7479  | 1.0000    | 150.0000  |
|                   | Pneumonia | 32.7391   | 63.1724  | 24.0000   | 267.0000  |
|                   | COVID-19  | -19.1000  | 49.7381  | -27.5000  | 166.0000  |
| PARC_delta        | Control   | -9.2400   | 62.2356  | 4.0000    | 326.0000  |
|                   | Pneumonia | 30.5652   | 119.0633 | 6.0000    | 665.0000  |
|                   | COVID-19  | -1.3000   | 22.4155  | -11.0000  | 67.0000   |
| SAP_delta         | Control   | -0.4522   | 2.9285   | -0.7000   | 14.0000   |
|                   | Pneumonia | -0.6048   | 3.2358   | 0.3000    | 14.0000   |
|                   | COVID-19  | -1.4444   | 2.6977   | -2.0000   | 7.0000    |
| SCF_delta         | Control   | -6.1522   | 84.7455  | 26.0000   | 328.0000  |
|                   | Pneumonia | -25.6053  | 129.7365 | 36.0000   | 478.0000  |
|                   | COVID-19  | -68.5000  | 145.2810 | -26.0000  | 359.0000  |
| RANTES_delta      | Control   | -2.6043   | 9.5327   | -2.0000   | 41.0000   |
|                   | Pneumonia | -1.6186   | 6.5778   | -1.0000   | 30.8000   |
|                   | COVID-19  | 0.2000    | 3.8178   | -1.0000   | 10.3000   |
| TBG_delta         | Control   | 0.0455    | 6.9862   | 2.0000    | 32.0000   |
|                   | Pneumonia | -1.0909   | 8.0054   | 0000      | 30.0000   |
|                   | COVID-19  | -5.7778   | 5.9954   | -5.0000   | 20.0000   |
| TIMP-1_delta      | Control   | -6.2308   | 47.2130  | 3.0000    | 235.0000  |
|                   | Pneumonia | 18.5217   | 81.1440  | 14.0000   | 425.0000  |
|                   | COVID-19  | 18.7000   | 153.8318 | -23.5000  | 594.0000  |
| TNF-alpha_delta   | Control   | 1.0000    | .        | 1.0000    | 0000      |
|                   | Pneumonia | 33.5000   | 0000     | 33.5000   | 0000      |
|                   | COVID-19  | -30.5000  | .        | -30.5000  | 0000      |
| TNFR2_delta       | Control   | -4.6625   | 25.1806  | -0.4000   | 136.0000  |
|                   | Pneumonia | 1.5652    | 9.2826   | 3.0000    | 38.0000   |
|                   | COVID-19  | 3.7800    | 24.3492  | -2.6000   | 89.0000   |
| VCAM-1_delta      | Control   | -1.3846   | 168.9885 | 2.0000    | 791.0000  |
|                   | Pneumonia | 75.4762   | 233.0278 | 13.0000   | 1080.0000 |
|                   | COVID-19  | -5.0000   | 138.3962 | -20.0000  | 468.0000  |
| VEGF_delta        | Control   | -1.0435   | 59.4623  | 6.0000    | 259.0000  |
|                   | Pneumonia | 29.0476   | 79.9015  | 8.0000    | 349.0000  |

|                    |           |           |          |           |           |
|--------------------|-----------|-----------|----------|-----------|-----------|
|                    | COVID-19  | -24.0000  | 92.2870  | -45.0000  | 351.0000  |
| VDBP_delta         | Control   | -4.2000   | 38.7933  | -8.0000   | 178.0000  |
|                    | Pneumonia | 2.2609    | 37.5018  | 3.0000    | 159.0000  |
|                    | COVID-19  | -8.6000   | 37.5949  | -3.5000   | 127.0000  |
| vWF_delta          | Control   | -13.1200  | 65.5968  | -8.0000   | 272.0000  |
|                    | Pneumonia | -21.2727  | 176.8785 | 8.5000    | 1021.0000 |
|                    | COVID-19  | -64.8000  | 130.1109 | -50.0000  | 479.0000  |
| AFP_delta          | Control   | -0.0820   | 0.7295   | -0.4000   | 1.4200    |
|                    | Pneumonia | 0.1318    | 0.8746   | 0.7100    | 2.5200    |
|                    | COVID-19  | 0.7100    | .        | 0.7100    | 0000      |
| ANG-1_delta        | Control   | 0.3846    | 10.1354  | 0000      | 47.0000   |
|                    | Pneumonia | 1.7762    | 11.6924  | 1.0000    | 56.0000   |
|                    | COVID-19  | -3.3889   | 4.7551   | -2.0000   | 16.0000   |
| AXL_delta          | Control   | 0.4114    | 1.0057   | 0.2500    | 3.5000    |
|                    | Pneumonia | -0.1417   | 1.0647   | -0.2500   | 4.0000    |
|                    | COVID-19  | 0.0875    | 1.2100   | 0.1000    | 4.2000    |
| CA-125_delta       | Control   | -2.7500   | 7.0373   | -2.0000   | 22.1500   |
|                    | Pneumonia | -2.0275   | 12.0045  | 2.1000    | 47.0000   |
|                    | COVID-19  | 1.8000    | 6.4285   | 2.4500    | 15.6000   |
| CA-19-9_delta      | Control   | 1.3955    | 6.9721   | 0000      | 27.0000   |
|                    | Pneumonia | -1.0912   | 8.1036   | -1.0000   | 36.0000   |
|                    | COVID-19  | -1.6188   | 6.1709   | -2.4250   | 21.0000   |
| CA-9_delta         | Control   | 0.0151    | 0.1026   | -0.0001   | 0.5300    |
|                    | Pneumonia | -0.0053   | 0.0356   | 0.0100    | 0.1200    |
|                    | COVID-19  | 0.0004    | 0.0567   | -0.0235   | 0.1600    |
| CEA_delta          | Control   | -0.2347   | 1.0656   | -0.1000   | 4.5100    |
|                    | Pneumonia | -0.1232   | 0.5443   | -0.1000   | 2.5000    |
|                    | COVID-19  | 0.0350    | 0.6395   | -0.1000   | 2.1000    |
| HCC-4_delta        | Control   | 0.0318    | 0.3969   | 0.1000    | 1.6000    |
|                    | Pneumonia | 0.0700    | 0.6219   | -0.1000   | 2.0000    |
|                    | COVID-19  | 0.1171    | 0.1472   | 0.1000    | 0.4400    |
| Decorin_delta      | Control   | 0.0517    | 0.2130   | 0.1000    | 0.9000    |
|                    | Pneumonia | -0.0353   | 0.3278   | -0.1000   | 1.4000    |
|                    | COVID-19  | 0.0143    | 0.3237   | -0.2000   | 0.8000    |
| FAS_delta          | Control   | -1.2667   | 4.5906   | -2.000    | 20.6000   |
|                    | Pneumonia | 0.1000    | 7.5247   | -0.5000   | 23.0000   |
|                    | COVID-19  | 4.2700    | 16.2882  | 1.5000    | 63.0000   |
| HGF_delta          | Control   | -0.5304   | 1.8497   | -0.8000   | 8.0000    |
|                    | Pneumonia | -2.8500   | 7.4527   | -2.5000   | 36.0000   |
|                    | COVID-19  | -9.2556   | 29.6102  | -3.0000   | 101.0000  |
| hCG_delta          | Control   | -0.3000   | .        | -0.3000   | 0000      |
|                    | Pneumonia | -0.0875   | 1.6555   | 0.3500    | 3.8500    |
|                    | COVID-19  | 0.6667    | 2.0306   | -0.3000   | 3.7000    |
| IL-18bp_delta      | Control   | 0000      | 1.1662   | -0.1000   | 4.0000    |
|                    | Pneumonia | -0.6923   | 3.9872   | -1.0000   | 13.0000   |
|                    | COVID-19  | -0.1900   | 2.6510   | -1.0000   | 8.0000    |
| MMP-1_delta        | Control   | -0.6042   | 2.8472   | 0.0500    | 14.0000   |
|                    | Pneumonia | -0.6000   | 10.1490  | 1.0000    | 52.0000   |
|                    | COVID-19  | -0.4100   | 5.0479   | -1.5000   | 18.0000   |
| MMP-7_delta        | Control   | 0.0840    | 1.2912   | 0.2000    | 7.0000    |
|                    | Pneumonia | -0.0833   | 1.1346   | -0.1000   | 4.0000    |
|                    | COVID-19  | -0.4286   | 3.2201   | -0.2000   | 10.4000   |
| MMP-9, total_delta | Control   | -69.7692  | 335.2541 | -21.0000  | 1726.0000 |
|                    | Pneumonia | -57.6957  | 204.1705 | -56.0000  | 987.0000  |
|                    | COVID-19  | -269.2000 | 411.2982 | -165.5000 | 1380.0000 |
| NSE_delta          | Control   | 0.4152    | 1.3924   | 0.0200    | 7.3100    |
|                    | Pneumonia | -0.0690   | 0.3967   | -0.1000   | 1.5900    |
|                    | COVID-19  | -0.1522   | 2.0987   | -0.3000   | 7.6100    |
| PECAM-1_delta      | Control   | -0.2917   | 7.7487   | 2.0000    | 35.0000   |
|                    | Pneumonia | -2.3333   | 14.1751  | 2.0000    | 65.0000   |
|                    | COVID-19  | -1.8889   | 10.5883  | -5.0000   | 32.0000   |
| SP-D_delta         | Control   | -0.2125   | 1.8319   | -0.1000   | 9.0000    |
|                    | Pneumonia | -2.9476   | 7.3474   | -1.0000   | 35.0000   |



|                |           |         |        |         |         |
|----------------|-----------|---------|--------|---------|---------|
| TRAIL-R3_delta | COVID-19  | 0.5556  | 9.1667 | -2.0000 | 30.0000 |
|                | Control   | 0.1261  | 0.9117 | 0.1000  | 3.7000  |
|                | Pneumonia | -0.7667 | 2.6337 | -1.0000 | 12.0000 |
|                | COVID-19  | -0.4222 | 0.9378 | -0.6000 | 3.1000  |
